# Supplementary material for: IL-10 from dendritic cells but not from T regulatory cells protects against cisplatin-induced nephrotoxicity
Source: PubMed Central journal article supplement (PMC7478814; doi:10.1371/journal.pone.0238816), 2020-09-08
Supplement: pone.0238816.s001.pdf [file pone.0238816.s001.pdf]

## The ARRIVE Essential 10

These items are the basic minimum to include in a manuscript. Without this information, readers and reviewers cannot assess the reliability of the findings.

| Item                                       | Recommendation                                                                                                                                                                                                                                                       | Section/line number, or reason for not reporting         |
|--------------------------------------------|----------------------------------------------------------------------------------------------------------------------------------------------------------------------------------------------------------------------------------------------------------------------|----------------------------------------------------------|
| <b>Study design</b>                        | 1 For each experiment, provide brief details of study design including:                                                                                                                                                                                              | Methods/mice                                             |
|                                            | a. The groups being compared, including control groups. If no control group has been used, the rationale should be stated.<br>b. The experimental unit (e.g. a single animal, litter, or cage of animals).                                                           | Methods/mice                                             |
| <b>Sample size</b>                         | 2 a. Specify the exact number of experimental units allocated to each group, and the total number in each experiment. Also indicate the total number of animals used.                                                                                                | Figure legends                                           |
|                                            | b. Explain how the sample size was decided. Provide details of any <i>a priori</i> sample size calculation, if done.                                                                                                                                                 | Based on previous studies                                |
| <b>Inclusion and exclusion criteria</b>    | 3 a. Describe any criteria used for including and excluding animals (or experimental units) during the experiment, and data points during the analysis. Specify if these criteria were established <i>a priori</i> . If no criteria were set, state this explicitly. | no exclusions                                            |
|                                            | b. For each experimental group, report any animals, experimental units or data points not included in the analysis and explain why. If there were no exclusions, state so.                                                                                           | no exclusions                                            |
|                                            | c. For each analysis, report the exact value of <i>n</i> in each experimental group.                                                                                                                                                                                 | figure legends                                           |
| <b>Randomisation</b>                       | 4 a. State whether randomisation was used to allocate experimental units to control and treatment groups. If done, provide the method used to generate the randomisation sequence.                                                                                   | No randomisation                                         |
|                                            | b. Describe the strategy used to minimise potential confounders such as the order of treatments and measurements, or animal/cage location. If confounders were not controlled, state this explicitly.                                                                | Enter details here                                       |
| <b>Blinding</b>                            | 5 Describe who was aware of the group allocation at the different stages of the experiment (during the allocation, the conduct of the experiment, the outcome assessment, and the data analysis).                                                                    | Counting and data analysis was done blindly              |
| <b>Outcome measures</b>                    | 6 a. Clearly define all outcome measures assessed (e.g. cell death, molecular markers, or behavioural changes).                                                                                                                                                      | Figures                                                  |
|                                            | b. For hypothesis-testing studies, specify the primary outcome measure, i.e. the outcome measure that was used to determine the sample size.                                                                                                                         | Previously established mouse numbers                     |
| <b>Statistical methods</b>                 | 7 a. Provide details of the statistical methods used for each analysis, including software used.                                                                                                                                                                     | Methods/statistical analysis                             |
|                                            | b. Describe any methods used to assess whether the data met the assumptions of the statistical approach, and what was done if the assumptions were not met.                                                                                                          | If assumption was not met, we concluded as no difference |
| <b>Experimental animals</b>                | 8 a. Provide species-appropriate details of the animals used, including species, strain and substrain, sex, age or developmental stage, and, if relevant, weight.                                                                                                    | Methods/mice                                             |
|                                            | b. Provide further relevant information on the provenance of animals, health/immune status, genetic modification status, genotype, and any previous procedures.                                                                                                      | Methods/mice                                             |
| <b>Experimental procedures</b>             | 9 For each experimental group, including controls, describe the procedures in enough detail to allow others to replicate them, including:                                                                                                                            | Methods                                                  |
|                                            | a. What was done, how it was done and what was used.                                                                                                                                                                                                                 | Methods                                                  |
|                                            | b. When and how often.                                                                                                                                                                                                                                               | Methods                                                  |
|                                            | c. Where (including detail of any acclimatisation periods).                                                                                                                                                                                                          | Methods                                                  |
| d. Why (provide rationale for procedures). | Methods                                                                                                                                                                                                                                                              |                                                          |
| <b>Results</b>                             | 10 For each experiment conducted, including independent replications, report:                                                                                                                                                                                        | Methods/statistical analysis                             |
|                                            | a. Summary/descriptive statistics for each experimental group, with a measure of variability where applicable (e.g. mean and SD, or median and range).                                                                                                               | Methods/statistical analysis                             |
|                                            | b. If applicable, the effect size with a confidence interval.                                                                                                                                                                                                        | Methods/statistical analysis                             |
